# Supplementary material for: Proteasome Activation is Mediated via a Functional Switch of the Rpt6 C-terminal Tail Following Chaperone-dependent Assembly
Source: PubMed Central journal article supplement (PMC4598862; doi:10.1038/srep14909), 2015-10-09
Supplement: srep14909-s1.pdf [file srep14909-s1.pdf]

## SUPPLEMENTARY INFORMATION

### Proteasome Activation is Mediated via a Functional Switch of the Rpt6 C-terminal Tail

#### Following Chaperone-dependent Assembly

Vladyslava Sokolova<sup>#</sup>, Frances Li<sup>#</sup>, George Polovin and Soyeon Park\*

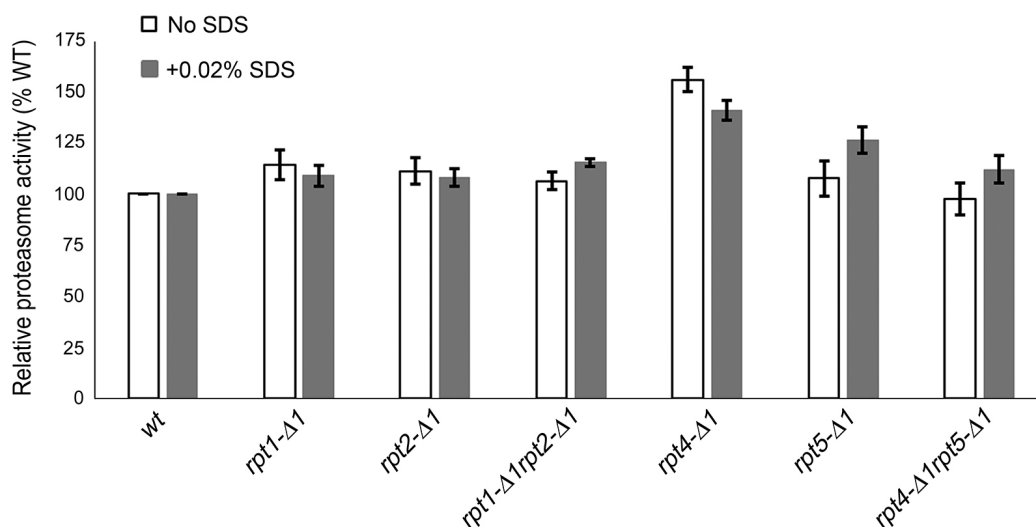

#### Supplementary Figure 1. Quantification of proteasome activities from Rpt tail mutants.

Relative proteasome activities (RP<sub>2</sub>-CP and RP<sub>1</sub>-CP) from independent experiments (n=6) as in Fig. 2a are shown in mean ± SEM (standard error of the mean). Values of proteasome activities of the indicated cells were quantified using ImageJ software, and divided by the values of wild-type to obtain the relative proteasome activities on the Y axis. Calculations were performed individually for samples without SDS as in Fig. 2a (top panel), and with 0.02% SDS as in Fig. 2a (bottom panel) for each experiment (n=6). Note that the *rpt4-Δ1* proteasomes appear to exhibit increased activities, indicating that CP-Rpt4 tail interaction might prevent aberrant enhancement of gate opening in the proteasome.

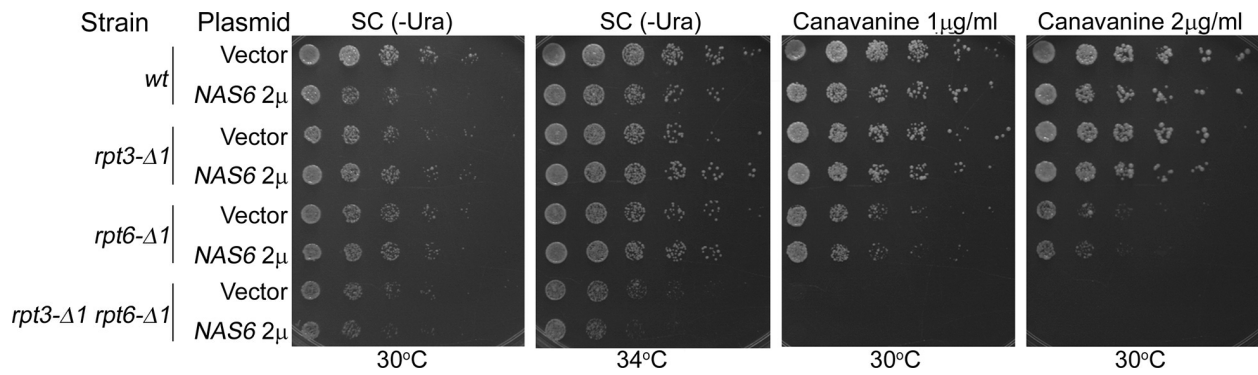

**Supplementary Figure 2. Nas6 overexpression does not rescue growth defects of *rpt3- $\Delta$ 1*, *rpt6- $\Delta$ 1* or *rpt3- $\Delta$ 1rpt6- $\Delta$ 1* cells.** Nas6 was overexpressed from a high-copy 2 $\mu$  plasmid carrying uracil as a selection marker. Either empty vector or Nas6 plasmid was transformed into the indicated yeast strains. Four-fold serial dilutions of the indicated cells were spotted onto synthetic medium lacking uracil (SC-Ura). Canavanine (an arginine analog) was supplemented to synthetic medium lacking both uracil and arginine. Cells were grown for 2-3 days at indicated temperatures.

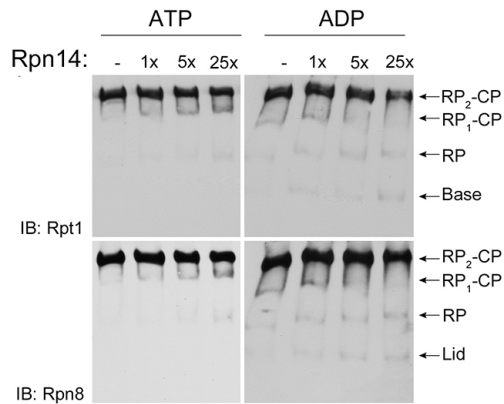

**Supplementary Figure 3. Rpn14 does not promote RP dissociation from the proteasome in the presence of ADP.** Immunoblotting of native gels showing the effect of Rpn14 on the RP-CP interaction in the proteasome. Affinity-purified proteasomes (0.6 pmol) were mixed with 1, 5, and 25 fold molar excess of recombinant Rpn14 for 30 min at 30°C in the presence of ATP (2 mM) and an ATP regeneration system or ADP (2 mM). The samples were then resolved by 3.5% native gel and immunoblotted for Rpt1 (base subunit) and Rpn8 (lid subunit).
